# Supplementary material for: Long-term outcomes after critical illness: recent insights
Source: Springer Nature journal article supplement (doi:10.1186/s13054-021-03535-3), 2021-03-17
Supplement: MOESM1 [file 18976560]

## Long-term outcomes after critical illness: recent insights

Rousseau AF et al

### Online Supplementary material

**Table S1.** Suggested core outcome set in relation to the expanded definition of PICS, and non-exhaustive list of measurement tools that are commonly used in the published studies, with their normal value or range if available.

| Post-ICU outcomes     |                      | Common measurement tools                                                                                                                                                                                                                                                   | Normal values where available                          |
|-----------------------|----------------------|----------------------------------------------------------------------------------------------------------------------------------------------------------------------------------------------------------------------------------------------------------------------------|--------------------------------------------------------|
| Physical disabilities | Muscle mass          | Quadriceps ultrasonography, computerized tomography at lumbar level                                                                                                                                                                                                        |                                                        |
|                       | Muscle strength      | Medical Research Council (MRC) Manual Muscle Test<br>Hand grip strength<br>Quadriceps strength                                                                                                                                                                             | >48<br>> 11 kg in males, > 7 kg in females             |
|                       | Muscle function      | 2- or 6-min walking test (2MWT or 6MWT)<br>Time up and go test (TUG)<br>Physical Function in Intensive Care Test scored (PFIT-s)<br>Chelsea Critical Care Physical Assessment tool (CPAx)<br>Short Physical Performance Battery (SPPB)<br>Physical activity questionnaires | depends on age and sex<br>< 13.5 sec, depending on age |
|                       | Respiratory function | Modified Medical Research Council Dyspnea Scale<br>Dyspnea-12 questionnaire<br>Diaphragm ultrasonography<br>Maximal inspiratory and expiratory pressures<br>Pulmonary function tests                                                                                       | ≥ 10<br><br>depends on age, sex, anthropometrics       |
|                       | Autonomy             | Barthel Index<br>Instrumental Activities of Daily Living (IADL)<br>Functional Independence Measure (FIM)                                                                                                                                                                   |                                                        |

|  |                       |                                                                                                                                                                             |                                                                              |
|--|-----------------------|-----------------------------------------------------------------------------------------------------------------------------------------------------------------------------|------------------------------------------------------------------------------|
|  | Swallowing disorders  | Eating Assessment Tool (EAT-10)<br>Water swallow test<br>Bedside swallow evaluation<br>Oropharyngo-esophageal scintigraphy or flexible endoscopic evaluation                | < 3                                                                          |
|  | Osteopenia            | Bone mineral density (dual-energy X-ray absorptiometry)<br>Bone turnover biomarkers                                                                                         |                                                                              |
|  | Metabolic disorders   | Biomarkers<br>Body weight                                                                                                                                                   |                                                                              |
|  | Endocrine dysfunction | Biomarkers                                                                                                                                                                  |                                                                              |
|  | Vulnerability         | Clinical Frailty Scale                                                                                                                                                      |                                                                              |
|  | Mental disorders      | Hospital Anxiety and Depression Scale (HADS)<br>Impact of Event Scale – revised (IES-R)<br>Generalized Anxiety Disorder scale (GAD)<br>Patient health questionnaires        | <7 in each subscale<br><22, 1 month after trauma, <36, 3 months after trauma |
|  | Cognitive disorders   | Montreal Cognitive Assessment (MoCA)<br>Repeatable Battery for the Assessment of Neuropsychological Status (RBANS)                                                          | $\geq 26$                                                                    |
|  | Fatigue               | Numeric rating scale<br>Multidimensional Fatigue Inventory (MFI-20)<br>Functional Assessment Chronic Illness Therapy-Fatigue scale (FACIT-F)                                | depends on age and sex                                                       |
|  | Sleep disorders       | Pittsburg Sleep Quality Index (PSQI)<br>Epworth Sleepiness Scale                                                                                                            | < 5<br>0-6                                                                   |
|  | Chronic pain          | Numeric rating scale<br>Brief Pain Inventory – Short Form (BPI-SF)<br>Pain Self-Efficacy Questionnaire (PSEQ) Leads<br>assessment of neuropathic symptoms and signs (LANSS) |                                                                              |
|  | Quality of life       | The Short Form (36) Health Survey (SF-36)<br>EQ-5D instrument                                                                                                               |                                                                              |
